# Supplementary material
Source: PubMed Central journal article supplement (PMC8035240)
Supplement: NIHMS1658384-supplement-Supplementary___Appendix__online_only_material__etc___1.pdf [file NIHMS1658384-supplement-Supplementary___Appendix__online_only_material__etc___1.pdf]

## SUPPLEMENTARY INFORMATION

### References

Prior publications using single-item UBDRS CGI scores in addition to reference #28 (Augustine *et al*, 2015) in main text.

Adams HR, Kwon J, Marshall FJ, de Blicke EA, Pearce DA, Mink JW. Neuropsychological symptoms of juvenile-onset batten disease: experiences from 2 studies. *J Child Neurol*. 2007;22(5):621-627. doi:10.1177/0883073807302603.

Adams HR, Mink JW; University of Rochester Batten Center Study Group. Neurobehavioral features and natural history of juvenile neuronal ceroid lipofuscinosis (Batten disease). *J Child Neurol*. 2013;28(9):1128-1136. doi:10.1177/0883073813494813.

**Table S1.** Demographics and clinical outcome measures for participants with CLN3 disease.

| SP ID    | Age  | Sex | Height | Weight | UBDRS Scores <sup>a</sup> |            |                  |         | Vineland ABC <sup>b</sup> | Magnetic Resonance Spectroscopy <sup>c</sup> |        |        |                        |        |        |
|----------|------|-----|--------|--------|---------------------------|------------|------------------|---------|---------------------------|----------------------------------------------|--------|--------|------------------------|--------|--------|
|          |      |     |        |        | Physical                  | Capability | CGI <sup>d</sup> |         |                           | Parietal Gray Matter                         |        |        | Left Centrum Semiovale |        |        |
|          |      |     |        |        |                           |            | Wt               | Overall |                           | Cr                                           | Glx    | NAA    | Cr                     | Chol   | Myol   |
| SP1.2.2  | 13.3 | M   | 159    | 40.5   | 4.0                       | 10.0       | 11.7             | 2       | 88.0                      | N.D.                                         | N.D.   | N.D.   | N.D.                   | N.D.   | N.D.   |
| SP2.2.3  | 9.0  | M   | 124    | 24.9   | 3.0                       | 7.0        | 12.8             | 2       | 72.0                      | -0.699                                       | -0.254 | -1.568 | 1.085                  | 1.539  | 0.959  |
| SP3.2.1  | 9.5  | F   | 146    | 35.6   | 10.8                      | 6.0        | 16.3             | 3       | 53.0                      | 0.171                                        | 1.370  | 2.116  | -1.674                 | 0.998  | 0.363  |
| SP4.2.2  | 7.3  | M   | 132    | 25.8   | 4.0                       | 8.0        | 9.3              | 2       | 77.0                      | 0.317                                        | 0.423  | -0.266 | 0.086                  | 1.068  | 0.150  |
| SP5.2.2  | 13.2 | M   | 154    | 48.4   | 1.0                       | 13.0       | 10.5             | 2       | 110.0                     | 1.307                                        | 1.790  | -0.570 | 0.033                  | 0.430  | -0.309 |
| SP6.2.1  | 15.4 | M   | 175    | 71.7   | 33.0                      | 4.0        | 19.8             | 3       | 34.0                      | -2.649                                       | -5.363 | -5.646 | -0.013                 | -1.696 | -0.032 |
| SP7.2.1  | 11.4 | F   | 160    | 47.3   | 36.0                      | 3.0        | 19.8             | 3       | 23.0                      | -0.291                                       | -4.256 | -3.256 | 0.494                  | 2.464  | 0.074  |
| SP8.2.1  | 16.6 | F   | 164    | 52.2   | 18.0                      | 4.0        | 19.8             | 4       | 35.0                      | 0.358                                        | -2.986 | -3.624 | 1.097                  | 0.741  | 0.586  |
| SP9.2.1  | 16.6 | M   | 173    | 70.2   | 20.0                      | 6.0        | 18.7             | 3       | 42.0                      | -1.222                                       | -3.253 | -3.024 | 1.294                  | -0.772 | -0.144 |
| SP10.2.1 | 20.7 | F   | 165    | 68.5   | 58.0                      | 4.0        | 22.2             | 4       | 46.0                      | -4.294                                       | -8.925 | -7.714 | 0.460                  | 4.868  | 0.564  |
| SP10.2.5 | 6.8  | M   | 120    | 21.3   | 5.0                       | 14.0       | 10.5             | 2       | 83.0                      | 2.378                                        | 3.948  | 2.181  | -0.402                 | 0.965  | 0.138  |
| SP11.2.4 | 7.8  | M   | 129    | 28.2   | 6.0                       | 9.0        | 12.8             | 2       | 83.0                      | -0.576                                       | -0.386 | -0.903 | -0.703                 | 1.179  | -0.401 |
| SP12.2.1 | 9.3  | F   | 138    | 33.5   | 10.0                      | 9.0        | 11.7             | 2       | 70.0                      | -0.385                                       | -0.546 | -1.460 | -0.169                 | 0.846  | -0.266 |
| SP12.2.2 | 7.5  | F   | 122    | 24.2   | 4.0                       | 11.0       | 12.8             | 2       | 78.0                      | -0.134                                       | -0.424 | 0.062  | -0.476                 | 0.041  | 0.302  |
| SP13.2.3 | 7.8  | M   | 122    | 21     | 19.0                      | 5.0        | 16.3             | 3       | 66.0                      | -0.359                                       | -0.011 | -2.180 | 0.680                  | 0.467  | -0.124 |
| SP14.2.2 | 6.8  | M   | 122    | 23.7   | 3.0                       | 11.0       | 9.3              | 2       | 81.0                      | 0.290                                        | 0.561  | -1.100 | 0.910                  | 0.597  | -0.340 |
| SP15.2.1 | 10.0 | F   | 145    | 44.3   | 2.0                       | 10.0       | 14.0             | 3       | 84.0                      | 0.256                                        | -3.188 | -1.442 | -0.011                 | -0.004 | 0.070  |
| SP16.2.1 | 16.2 | F   | 161    | 71.5   | 9.0                       | 6.0        | 18.7             | 3       | 50.0                      | -1.766                                       | -8.831 | -5.783 | 1.022                  | 0.271  | 0.166  |
| SP16.2.2 | 15.1 | F   | 159    | 54.4   | 22.0                      | 4.0        | 21.0             | 4       | 26.0                      | -1.657                                       | -7.456 | -6.664 | 0.959                  | -1.466 | 0.729  |
| SP17.2.1 | 17.5 | M   | 168    | 45.7   | 61.0                      | 1.0        | 24.5             | 4       | 20.0                      | -2.148                                       | -8.406 | -7.438 | 1.136                  | 3.640  | 0.341  |
| SP18.2.1 | 11.6 | F   | 151.7  | 84.9   | 37.3                      | 6.0        | 24.5             | 4       | 35                        | 1.743                                        | -0.859 | -0.933 | 0.862                  | 2.855  | 0.133  |

<sup>a</sup>UBDRS: Unified Batten Disease Rating Scale. The Physical and Capability scores are weighted scores, calculated as described in Materials and Methods. <sup>b</sup>ABC: Adaptive Behavior Composite. <sup>c</sup>Values reflect the difference in tissue metabolite concentration between CLN3-Batten study participant and reference. <sup>d</sup>CGI: clinical global impression. The provided CGI scores include the weighted (Wt) scores, calculated as described in Materials and Methods, and the raw single-item overall score. Cr: creatinine. Glx: glutamine/glutamate/GABA. NAA: N-aspartylaspartate. N.D.: not done. Chol: choline. Myol: myo-inositol.

**Table S2.** Genotype and neurofilament light chain levels for participants with CLN3 disease.

| SP ID    | Genotype <sup>a</sup>                 | Allele 2                                                                 | Neurofilament light chain levels <sup>b</sup> |         |                     |
|----------|---------------------------------------|--------------------------------------------------------------------------|-----------------------------------------------|---------|---------------------|
|          |                                       |                                                                          | Cerebral Spinal Fluid                         |         | Serum               |
|          | Allele 1                              |                                                                          | PEA <sup>c</sup>                              | ELISA   | Simoa <sup>TM</sup> |
| SP1.2.2  | c.461-280_677+382del <sup>d</sup>     | c.1056+3A>C                                                              | 8.15                                          | 2722.30 | 14.82               |
| SP2.2.3  | c.678-610_1057-846dup <sup>e, h</sup> | c.678-610_1057-846dup                                                    | 9.62                                          | 1894.98 | 22.04               |
| SP3.2.1  | c.461-280_677+382del                  | c.461-280_677+382del                                                     | 9.20                                          | 1765.05 | 30.80               |
| SP4.2.2  | c.461-280_677+382del                  | c.1056G>T [p.(Gln352His)]                                                | 8.44                                          | 1259.32 | 21.47               |
| SP5.2.2  | c.1001G>A [p.(Arg334His)]             | c.1213C>T [p.(Arg405Trp)]                                                | 6.45                                          | 149.69  | 7.24                |
| SP6.2.1  | c.461-280_677+382del                  | c.461-280_677+382del                                                     | 9.30                                          | 1977.60 | 12.69               |
| SP7.2.1  | c.944dup [p.(His315Glnfs*67)]         | p.(His315Glnfs*67)                                                       | 9.73                                          | 2235.23 | 32.26               |
| SP8.2.1  | c.461-280_677+382del                  | c.461-280_677+382del                                                     | 10.40                                         | 3363.85 | 29.95               |
| SP9.2.1  | c.461-280_677+382del                  | c.461-280_677+382del                                                     | 9.96                                          | 2467.34 | 14.21               |
| SP10.2.1 | p.(Arg334His)                         | NC_000016.9:g.(28211763_28486693)_(28488725_28488776)del <sup>f, h</sup> | 10.79                                         | 4677.33 | 47.38               |
| SP10.2.5 | p.(Arg334His)                         | NC_000016.9:g.(28211763_28486693)_(28488725_28488776)del                 | 8.29                                          | 794.68  | 13.98               |
| SP11.2.4 | c.461-280_677+382del                  | c.461-280_677+382del                                                     | 10.31                                         | 4108.89 | 55.83               |
| SP12.2.1 | c.461-280_677+382del                  | c.461-280_677+382del                                                     | 9.09                                          | 1205.64 | 20.97               |
| SP12.2.2 | c.461-280_677+382del                  | c.461-280_677+382del                                                     | 8.63                                          | 999.17  | 20.29               |
| SP13.2.3 | c.678_838del <sup>g, h</sup>          | c.678_838del                                                             | 8.85                                          | 1143.14 | 40.20               |
| SP14.2.2 | c.461-280_677+382del                  | c.461-280_677+382del                                                     | 8.13                                          | 798.42  | 21.88               |
| SP15.2.1 | c.461-280_677+382del                  | c.206C>A [p.(Ser69*)] <sup>h</sup>                                       | 9.23                                          | 1246.49 | 15.90               |
| SP16.2.1 | c.461-280_677+382del                  | c.461-280_677+382del                                                     | 9.77                                          | 2239.00 | 23.15               |
| SP16.2.2 | c.461-280_677+382del                  | c.461-280_677+382del                                                     | 9.56                                          | 2120.36 | 46.47               |
| SP17.2.1 | c.461-280_677+382del                  | c.575G>A [p.(Gly192Glu)]                                                 | 10.52                                         | 4065.41 | 84.51               |
| SP18.2.1 | c.461-280_677+382del                  | c.622dup [p.Ser208Phefs*28)]                                             | 10.14                                         | 2787.42 | 32.71               |

<sup>a</sup> RefSeq: NG\_008654.2(CLN3\_v001)/LRG\_689t1, unless otherwise indicated. <sup>b</sup> The unit of measurement is normalized protein expression for PEA, and pg/mL for ELISA and Simoa<sup>TM</sup>. <sup>c</sup> PEA: proximal extension assay. <sup>d</sup> Common 1-kb (966 bp; exon 7-8) deletion. <sup>e</sup> Exon 9-13 homozygous duplication, {arr[GRCh37] 16p11.2(28490044\_28496049)x4 mat}. <sup>f</sup> Partial exon 15 deletion, {arr[GRCh37] 16p11.2(28486693\_28488725)x1}. <sup>g</sup> Exon 9-10 deletion. <sup>h</sup> Variant not reported in: 1) Leiden Open Variation Database. CLN3 (ceroid-lipofuscinosis, neuronal 3). <https://databases.lovd.nl/shared/variants/CLN3/unique>. Accessed 8/27/2020. 2) ClinVar. CLN3. <https://www.ncbi.nlm.nih.gov/clinvar/?term=cln3%5Bgene%5D>. Accessed 9/2/2020. 3) gnomAD. CLN3. [https://gnomad.broadinstitute.org/gene/ENSG00000188603?dataset=gnomad\\_r2\\_1](https://gnomad.broadinstitute.org/gene/ENSG00000188603?dataset=gnomad_r2_1). Accessed 8/27/2020.

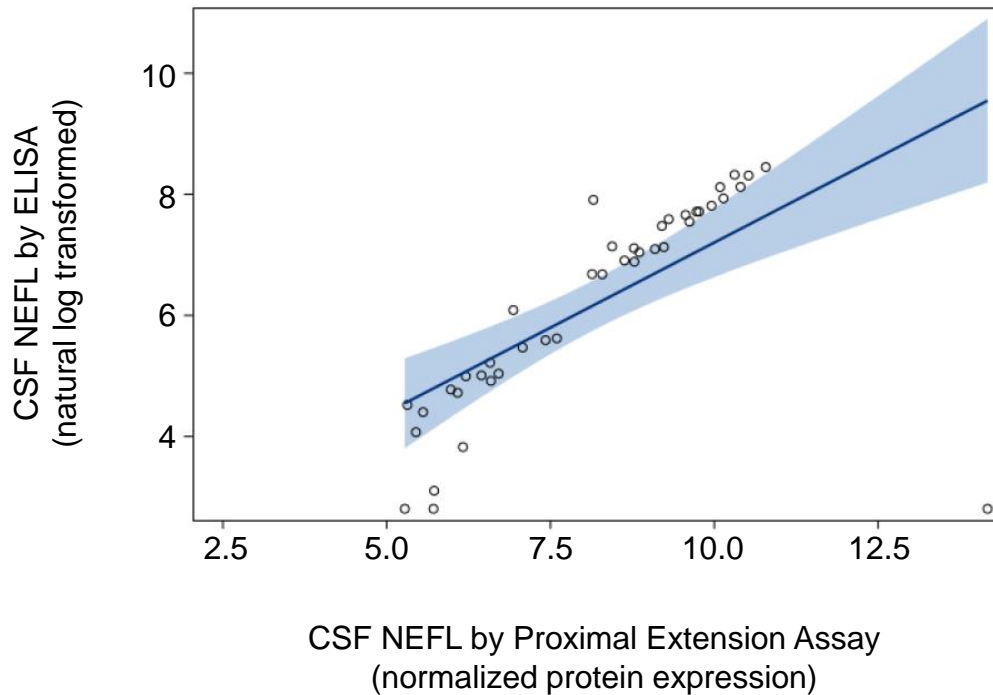

**Figure S1.** Correlation of CSF NEFL levels measured by ELISA (natural log transformed) and proximal extension assay.  $N=42$ .  $r_p=0.69$ ;  $p<.0001$ . Shaded area: 95% confidence interval. The outlier [PEA NPX=14.17, ELISA (non-transformed)=16.5 pg/mL (below limit of detection)] belongs to an unaffected pediatric laboratory control sample. CSF: cerebrospinal fluid. NEFL: neurofilament light chain. NPX: normalized protein expression. PEA: proximal extension assay.

A.

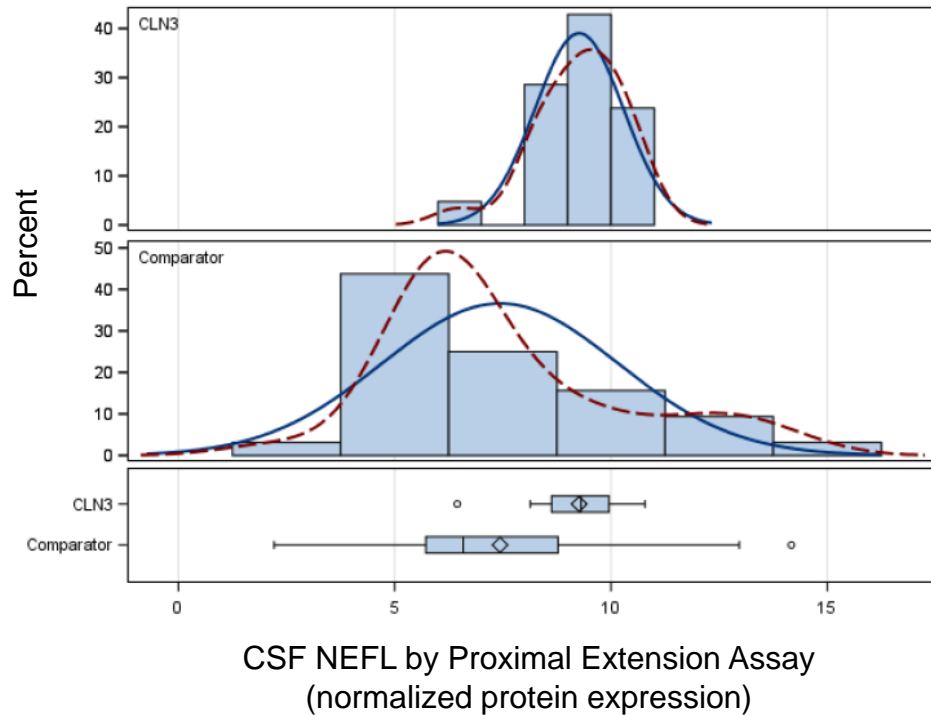

B.

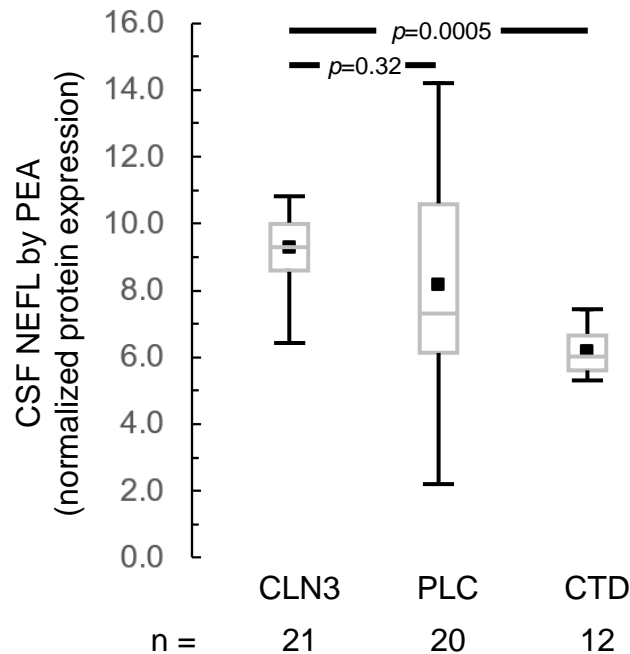

**Figure S2.** CSF NEFL level in samples from CLN3 versus non-CLN3 individuals measured by PEA. **A.** Top and middle panels: distribution of measured NEFL levels (solid line – normal; dashed line – kernel). Bottom panel: statistical values of measured NEFL levels {diamond – mean; box – median and interquartile range [IQR, Q1 (25<sup>th</sup> percentile) - Q3 (75<sup>th</sup> percentile)]; whiskers – minimum = Q1 – 1.5\*IQR and maximum = Q3 + 1.5\*IQR}.  $p=0.0013$ . **B.** NEFL levels in individual cohort.  $P$  values are derived from ANOVA and Bonferroni adjustment for multiple comparisons. CSF: cerebrospinal fluid. CTD: creatine transport deficiency. PLC: pediatric laboratory controls.

A.

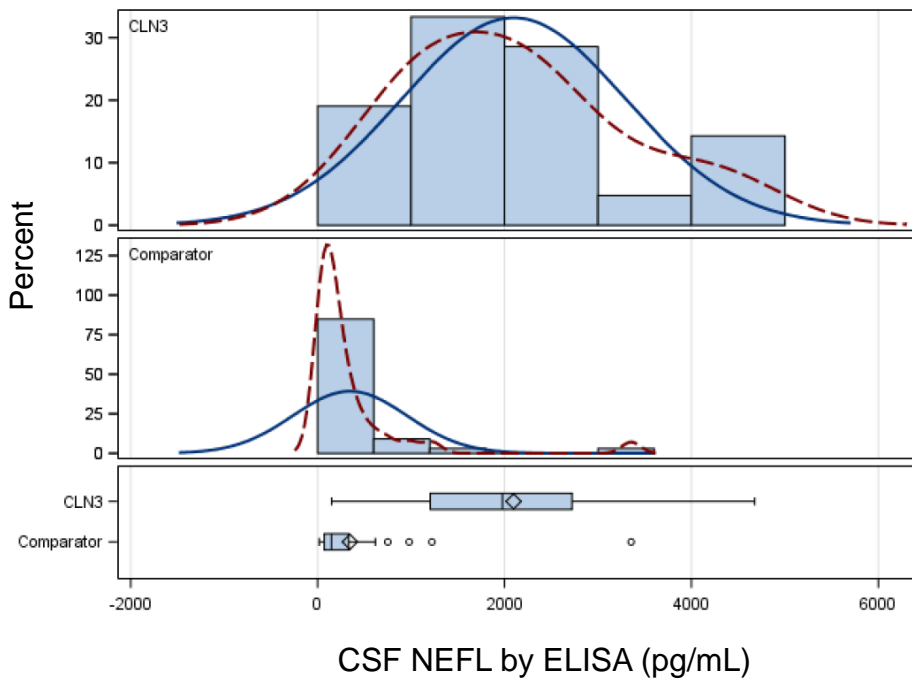

B.

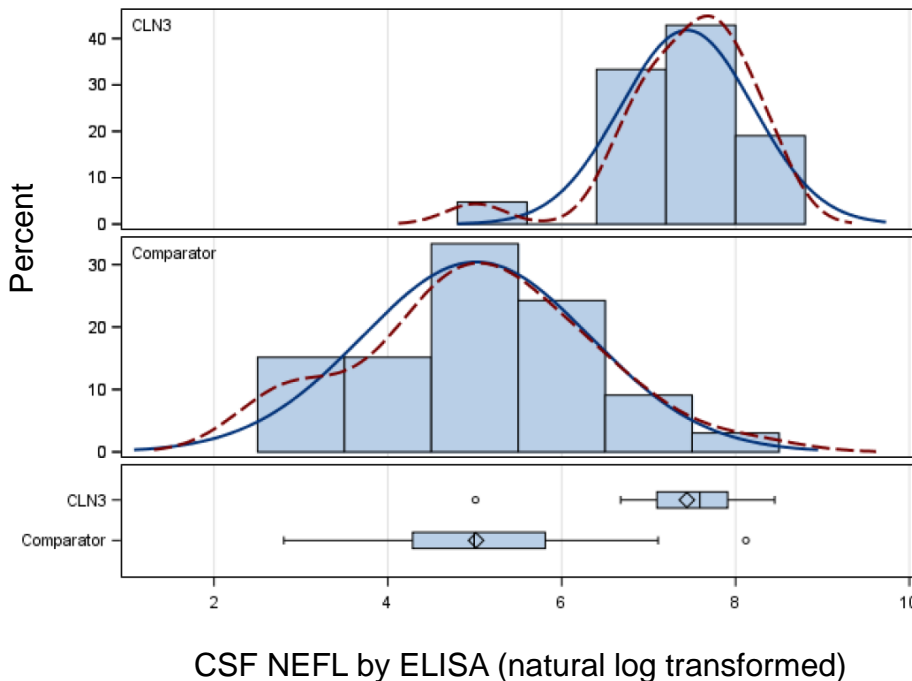

**Figure S3.** CSF NEFL level in samples from CLN3 versus non-CLN3 individuals measured by ELISA. **A.** Top and middle panels: distribution of measured NEFL levels (solid line – normal; dashed line – kernel). Bottom panel: statistical values of measured NEFL levels {diamond – mean; box – median and interquartile range [IQR, Q1 (25<sup>th</sup> percentile) - Q3 (75<sup>th</sup> percentile)]; whiskers – minimum = Q1 – 1.5\*IQR and maximum = Q3 + 1.5\*IQR}.  $p < .0001$ . **B.** Same as A, except for NEFL values are log-transformed. CSF: cerebrospinal fluid. NEFL: neurofilament light chain.

**A.**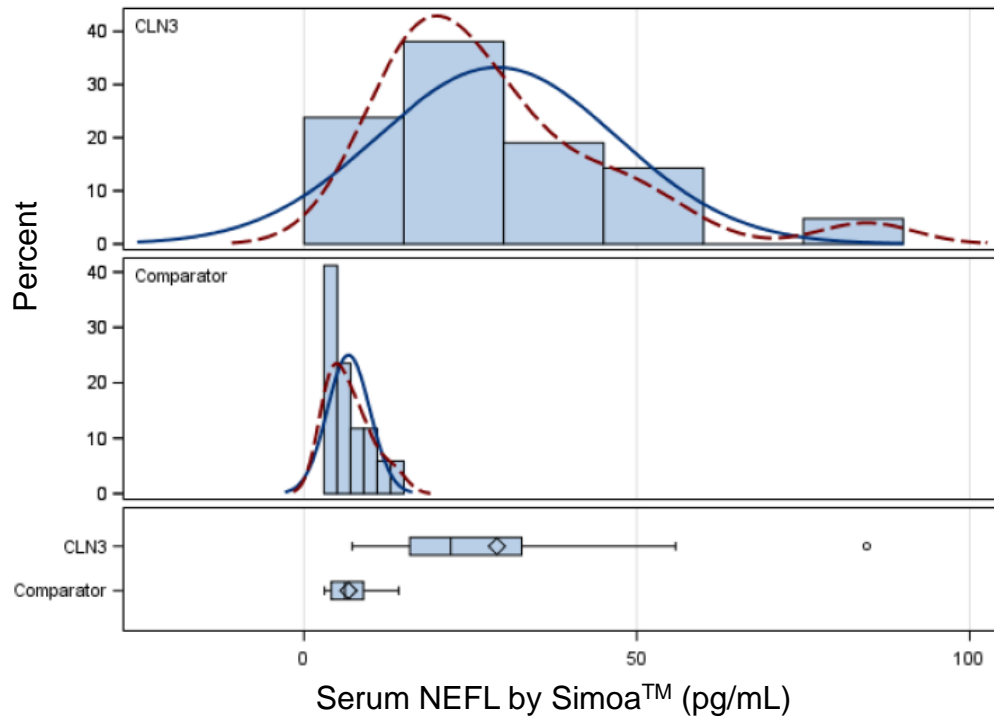**B.**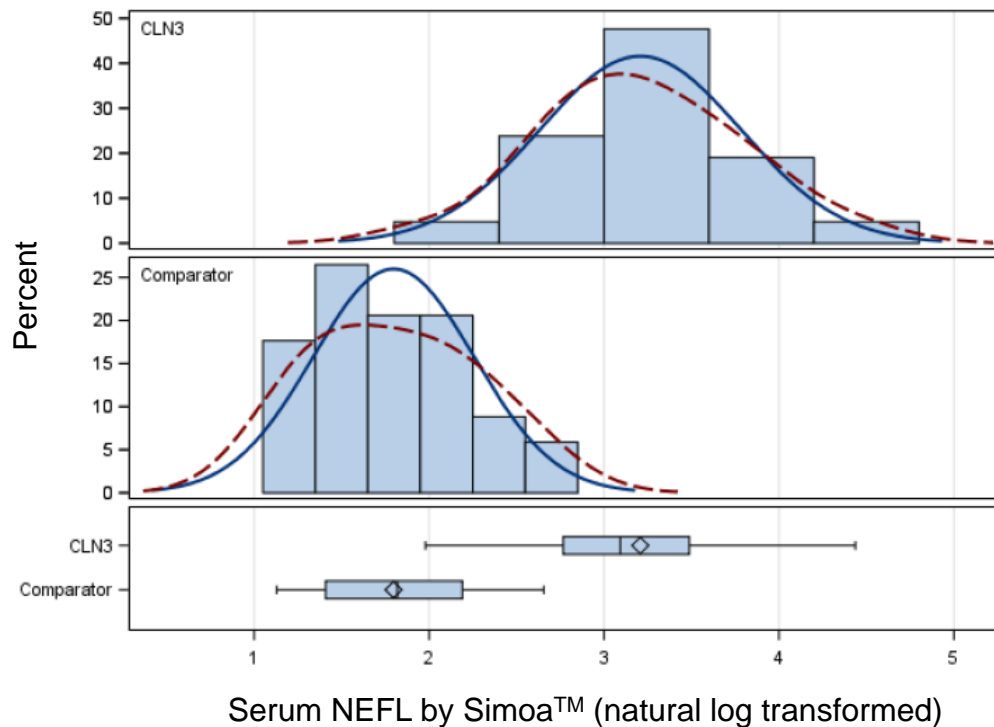

**Figure S4.** Serum NEFL level in samples from CLN3™ versus non-CLN3 individuals. **A.** Top and middle panels: distribution of measured NEFL levels (solid line – normal; dashed line – kernel). Bottom panel: statistical values of measured NEFL levels {diamond – mean; box – median and interquartile range [IQR, Q1 (25<sup>th</sup> percentile) - Q3 (75<sup>th</sup> percentile)]; whiskers – minimum = Q1 – 1.5\*IQR and maximum = Q3 + 1.5\*IQR}.  $p < .0001$ . **B.** Same as A, except for NEFL values are log-transformed. NEFL: neurofilament light chain.

**A.**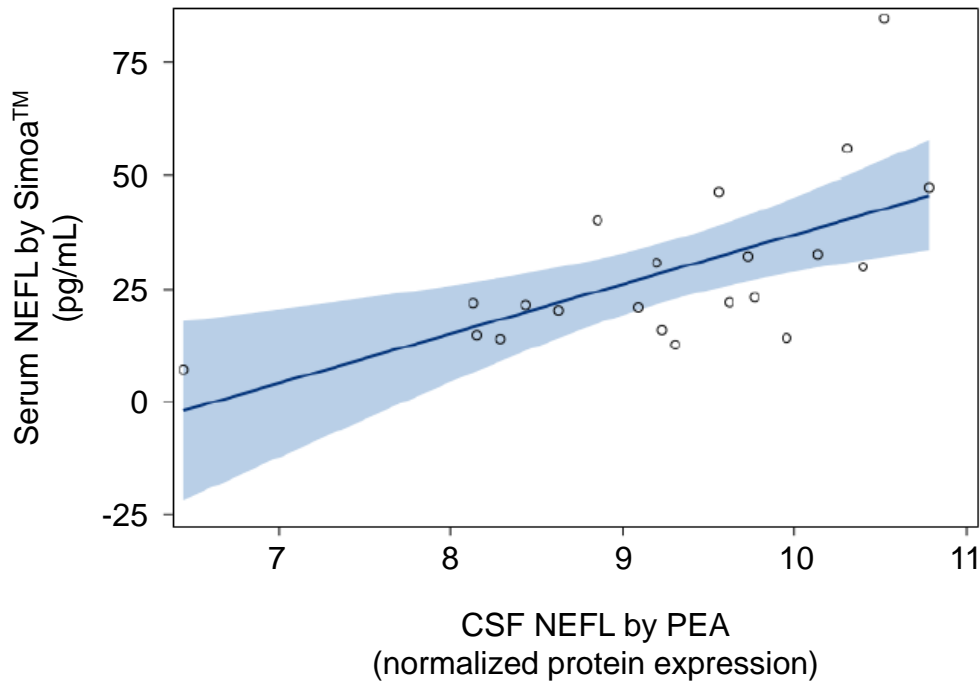**B.**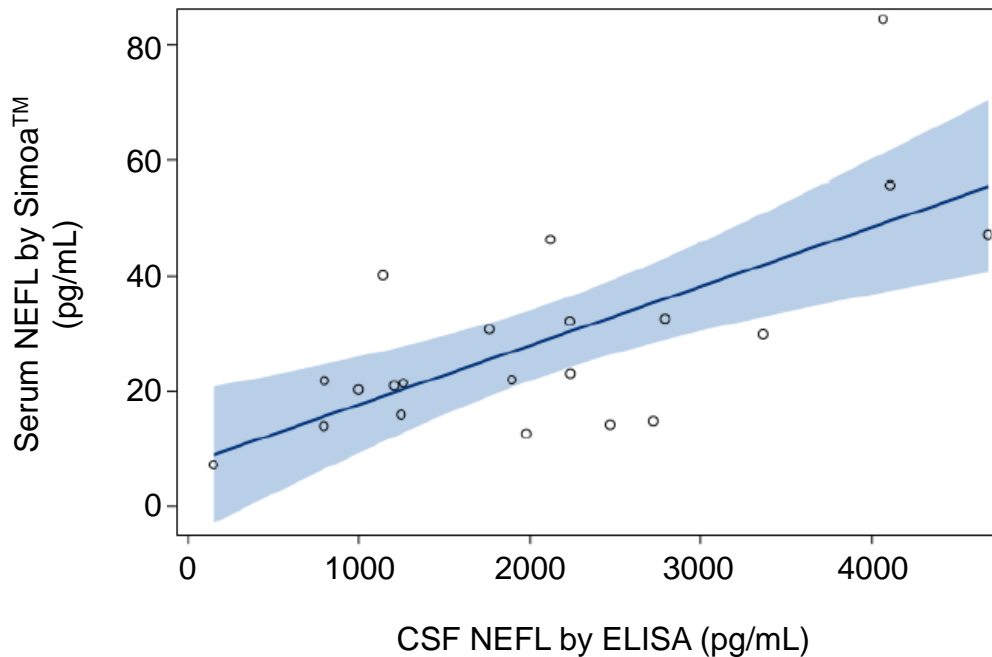

**Figure S5.** Correlation of NEFL levels in serum and CSF. **A.** Serum NEFL measured by Simoa™ versus CSF NEFL measured by PEA.  $N=21$ .  $r_p=0.75$ ;  $p<.0001$ . **B.** Serum NEFL measured by Simoa™ versus CSF NEFL measured by ELISA.  $N=21$ .  $r_p=0.83$ ;  $p<.0001$  Shaded area: 95% confidence interval. CSF: cerebrospinal fluid. NEFL: neurofilament light chain. PEA: proximal extension assay. Simoa™: single molecule array.



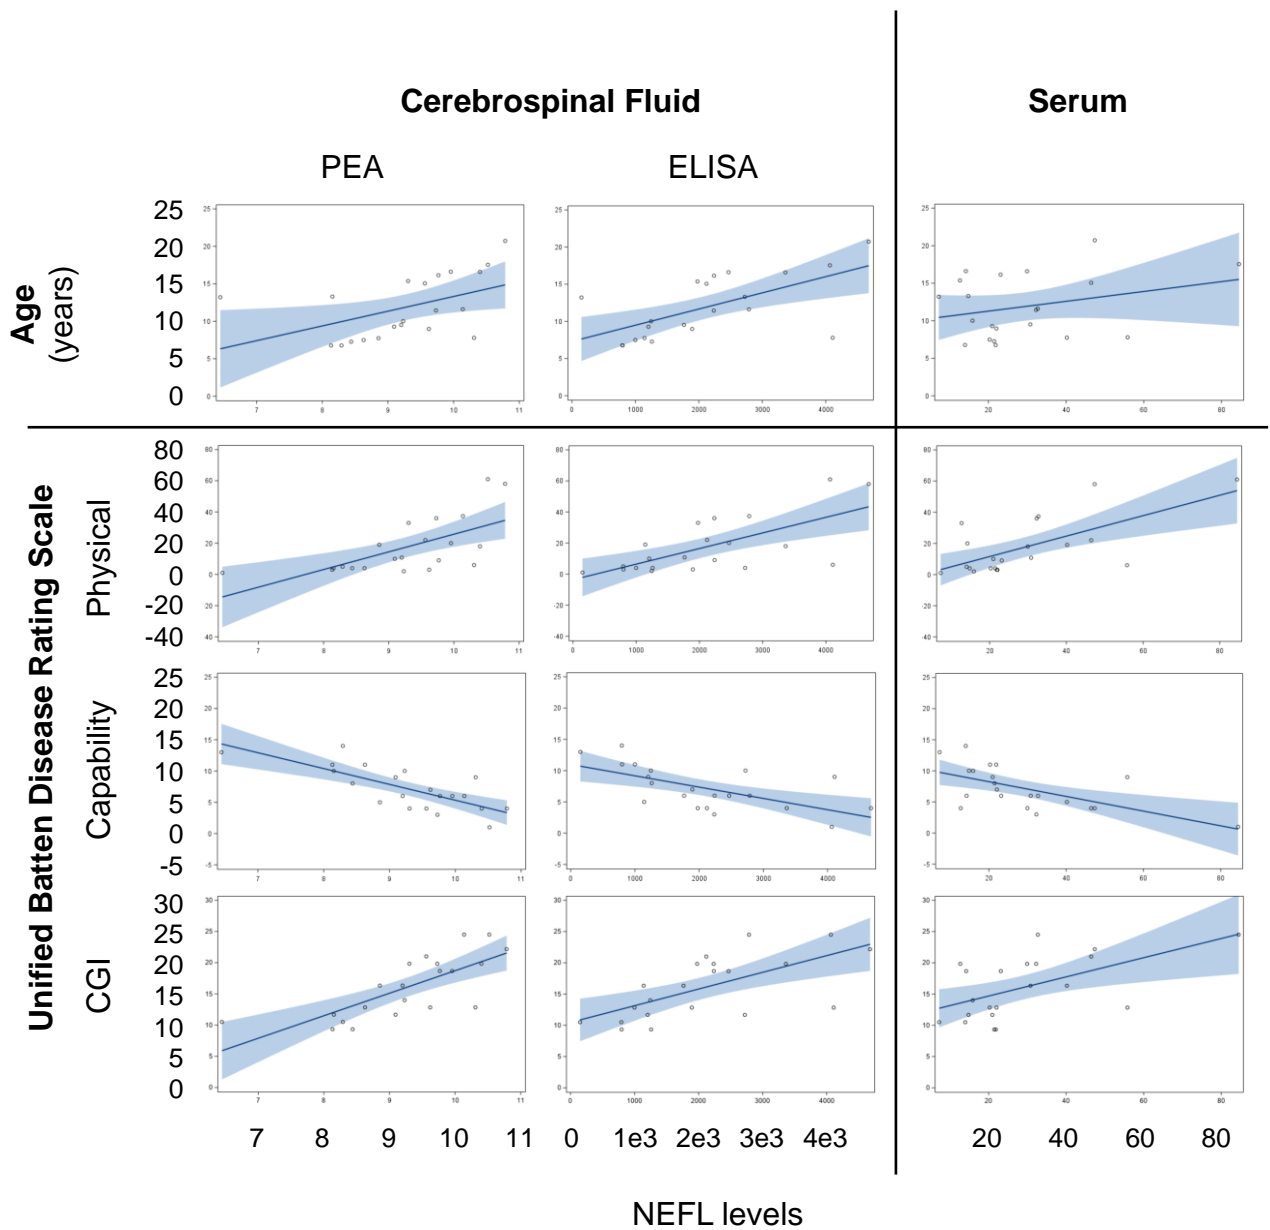

**Figure S6.** Correlation of NEFL levels with clinical outcome measures. Values on the x-axis are the same for all graphs in each respective column. Values on the y-axis are the same for all graphs in each respective row. Shaded area: 95% confidence interval. CGI: clinical global impression. ELISA: pg/mL. PEA: proximal extension assay (normalized protein expression). Simoa™: single molecule array (pg/mL).

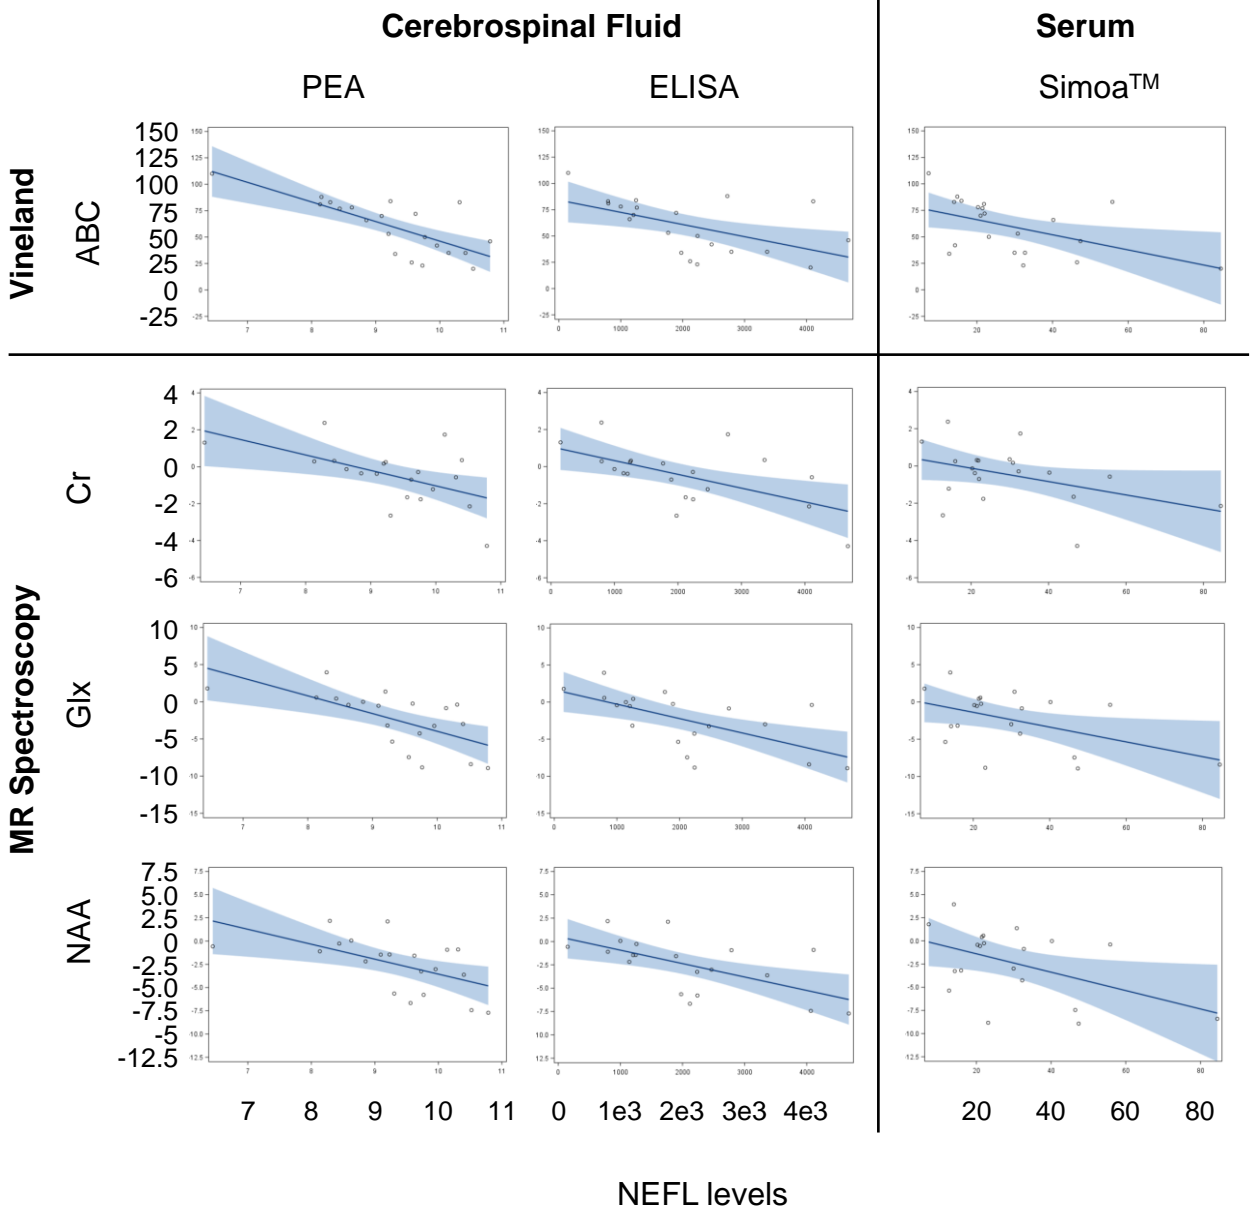

**Figure S7.** Correlation of NEFL levels with clinical outcome measures. Values on the x-axis are the same for all graphs in each respective column. Values on the y-axis are the same for all graphs in each respective row. Shaded area: 95% confidence interval. ABC: adaptive behavior composite. Cr: creatine. ELISA: pg/mL. Glx: glutamatergic metabolites. PEA: proximal extension assay (normalized protein expression). NAA: N-acetyl aspartate. Simoa™: single molecule array (pg/mL).

|                        | $r_p$ | 95% confidence interval |       | $p$ value |          |
|------------------------|-------|-------------------------|-------|-----------|----------|
|                        |       | Lower                   | Upper | Raw       | Adjusted |
| <i>CSF by PEA</i>      |       |                         |       |           |          |
| Weighted               | 0.74  | 0.45                    | 0.89  | 0.0001    | 0.0011   |
| Overall                | 0.67  | 0.34                    | 0.86  | 0.0004    | 0.0036   |
| <i>CSF by ELISA</i>    |       |                         |       |           |          |
| Weighted               | 0.64  | 0.29                    | 0.84  | 0.0001    | 0.0011   |
| Overall                | 0.58  | 0.19                    | 0.81  | 0.0044    | 0.027    |
| <i>Serum by Simoa™</i> |       |                         |       |           |          |
| Weighted               | 0.55  | 0.15                    | 0.79  | 0.0073    | 0.066    |
| Overall                | 0.53  | 0.13                    | 0.78  | 0.010     | 0.092    |

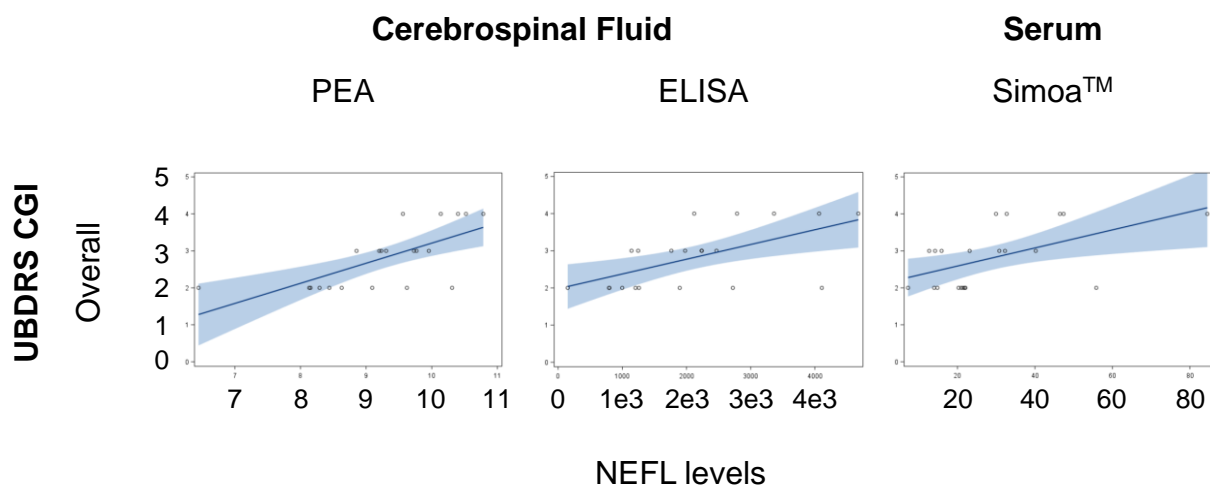

**Figure S8.** Correlation of NEFL levels with UBDRS CGI weighted and single-item overall scores. Upper panel table lists comparison values for both correlation methods, as prior publications (**Supplemental References**) only used single-item CGI scores. Lower panel graphs depict correlation of NEFL levels with UBDRS single-item overall CGI. Graphs of NEFL levels versus UBDRS weighted CGI are depicted in **Figure S6**. Shaded area: 95% confidence interval. CGI: clinical global impression. ELISA: pg/mL. PEA: proximal extension assay (normalized protein expression). UBDRS: Unified Batten Disease Rating Scale.  $r_p$ : correlation coefficient. Simoa™: single molecule array (pg/mL).
